# Supplementary material for: A multimillennial Alpine ice core chronology synchronized with an accurately dated Arctic Pb record
Source: Copernicus journal article supplement (doi:10.5194/egusphere-2025-2174), 2025-05-28
Supplement: Supplementary file 2 [file egusphere-2025-2174-supplement.pdf]

# Supplementary material for “A multimillennial Alpine ice core chronology synchronized with an accurately dated Arctic Pb record”

Paolo Gabrielli<sup>1,\*</sup>, Theo M. Jenk<sup>2,3,\*</sup>, Michele Bertó<sup>4</sup>, Giuliano Dreossi<sup>4</sup>, Daniela Festi<sup>5</sup>, Werner Kofler<sup>5</sup>,

5 Mai Winstrup<sup>6</sup>, Klaus Oegg<sup>5</sup>, Margit Schwikowski<sup>2,3,7</sup>, Barbara Stenni<sup>4</sup> and Carlo Barbante<sup>4,8</sup>

<sup>1</sup>Italian Glaciological Committee c/o University of Turin, Turin, Italy

<sup>2</sup>Center for Energy and Environmental Sciences, Paul Scherrer Institut, 5232 Villigen PSI, Switzerland

<sup>3</sup>Oeschger Centre for Climate Change Research, University of Bern, 3012 Bern, Switzerland

<sup>4</sup>Department of Environmental Sciences, Informatics and Statistics, Ca' Foscari University of Venice, Venice-Mestre, 30170,

10 Italy

<sup>5</sup>Institute for Botany, University of Innsbruck, Innsbruck, 6020, Austria

<sup>6</sup>DTU Space, Technical University of Denmark, Kongens Lyngby, 2800, Denmark

<sup>7</sup>Department of Chemistry and Biochemistry and Pharmaceutical Sciences, University of Bern, 3012 Bern, Switzerland

<sup>8</sup>Institute of Polar Sciences-CNR, Venice-Mestre, 30170, Italy

15 \*Equally contributed to this manuscript

*Correspondence to:* Paolo Gabrielli ([paologabrielli@hotmail.com](mailto:paologabrielli@hotmail.com)), Theo Jenk ([theo.jenk@psi.ch](mailto:theo.jenk@psi.ch)) and Carlo Barbante ([barbante@unive.it](mailto:barbante@unive.it))

## Supplementary text 1: structure of the TC2016 chronology

The initial chronology, TC2016 (Gabielli et al., 2016), was developed by utilizing a common depth scale for Alto dell'Ortles cores #1, #2, and #3, using core #2 depth as a reference. Depth alignment of core #2 with #1 and with #3 was accomplished by matching common features in their  $\delta^{18}\text{O}$  records (17 between #2 and #1, 14 between #2 and #3) (see Fig. 10 in Gabielli et al., 2016). This allowed the transfer of time markers in the cores to a common depth scale. Because of the lower resolution of the  $\delta^{18}\text{O}$  record in core #3, only two match features, or “tie points”, could be established between cores #3 and #2 below 60 m depth. However, we realized later that this resulted in a depth misalignment of only few tens of cm, which nevertheless resulted in a significant time lag (up to ~300 years) between the 3 cores. This mismatch in depth and time became apparent by comparing two new high resolution Pb concentration records from cores #1 and #3 with TC2016 (see main text). The much larger Pb variability below 60 m depth, compared to the  $\delta^{18}\text{O}$  variability, facilitated the detection of the initial mismatch of the isotope records in the ice cores.

## Supplementary text 2: The Colle Gnifetti ice core timescale

The Colle Gnifetti ice core (Mt. Rosa, Western Alps) is currently the oldest record from the Alps, dating back >15000  
5 years (Jenk et al., 2009). The Colle Gnifetti Pb record was previously published by Schwikowski et al. (2004) and Gabrieli  
and Barbante (2014). The chronology presented in the latter 2014 publication was based on the dating by Jenk et al. (2009).  
Here, we take advantage of a revised dating of the Colle Gnifetti ice core (CG03B) and a Pb record from that core. Compared  
to the timescale published by Jenk et al. (2009), CG03B (see details in Fig. S1) includes revisions in the counting of annual  
layers (ALC) based on additional reference horizons of historical Sahara dust layers (SDL) and volcanic layers (VL) (Sigl et  
10 al., 2018), as well as two additional  $^{14}\text{C}$ -dates (Sigl et al., 2009). Thus, CG03B timescale is based on ALC (from 1763 to 2003  
CE), a distinct  $^3\text{H}$  peak, historical SDL and VL, and was independently confirmed by absolute dating with  $^{210}\text{Pb}$  activity (Jenk  
et al., 2009; Sigl et al., 2018). Before 1763 CE ages are modeled as an exponential equation constrained by  $^{14}\text{C}$ -dates from the  
measured water insoluble organic carbon (WIOC-14) fraction of carbonaceous particles (Jenk et al., 2009; Sigl et al., 2009),  
assuming steady-state conditions and using a 1D ice flow model (2-parameter model, 2-p model) (Jenk et al., 2009). The  
15 CG03B timescale has a relatively small uncertainty back to 1763 CE (up to a maximum of around  $\pm 5$  years) that increases  
significantly to  $\sim \pm 250$  years at the beginning of the record at  $\sim 350$  CE. CG03B was previously used in Sigl et al. (2018) and  
Brugger et al. (2021).

In figs. S2-3 we provide a comparison of the Colle Gnifetti non-crustal Pb concentration record with the  
corresponding: i) the AN Arctic record which chronology was used as the reference time scale for the new dating of the Alto  
20 dell'Ortles cores by synchronization (Fig. S2; see also main text); ii) recent portion of the Alto dell'Ortles record on the  
CP2025/2 time scale (Fig S3). For the Colle Gnifetti core, the non-crustal Pb concentration record was obtained by using the  
average crustal Pb/Ti ratio (0.00545 obtained from Wedepohl, 1995).

### Supplementary text 3: Dansgaard-Johnsen (DJ) model framework

To understand our approach outlined in the main text, it is important to recognize that under the assumed steady-state conditions at the drill site, net annual snow accumulation ( $b$ , which in the accumulation zone equals the mass balance at that point; Cogley et al., 2011) and  $v_x$  along the glacier vertical profile are closely related. For reasons of mass conservation, if the amount of accumulated snow is not to increase the thickness of the glacier at that point, the same mass quantity must be removed from the ice column below. In more glaciological terms, the accumulated snow needs to be balanced by the horizontal strain and, due to the incompressibility of ice, the corresponding vertical strain rates (note the reduction to 1D, i.e., to the vertical axis). These fundamental principles are governed by the equation of continuity which, if integrated over the ice thickness, can also be written to relate to time and density (e.g., Whillans, 1977). In the DJ model, which considers these principles, the cumulative vertical strain of a layer at a certain depth over time (i.e., the total thinning) is related to the value of  $h$ . The DJ model accounts for the importance of density by using m w.e. as unit of length. This is essential, because in the firn section of the vertical column a substantial part of the horizontal stress will not cause deformation (i.e. the thinning governed by the model related to the incompressibility of ice), but instead enhances firn compaction by internal creep.

15

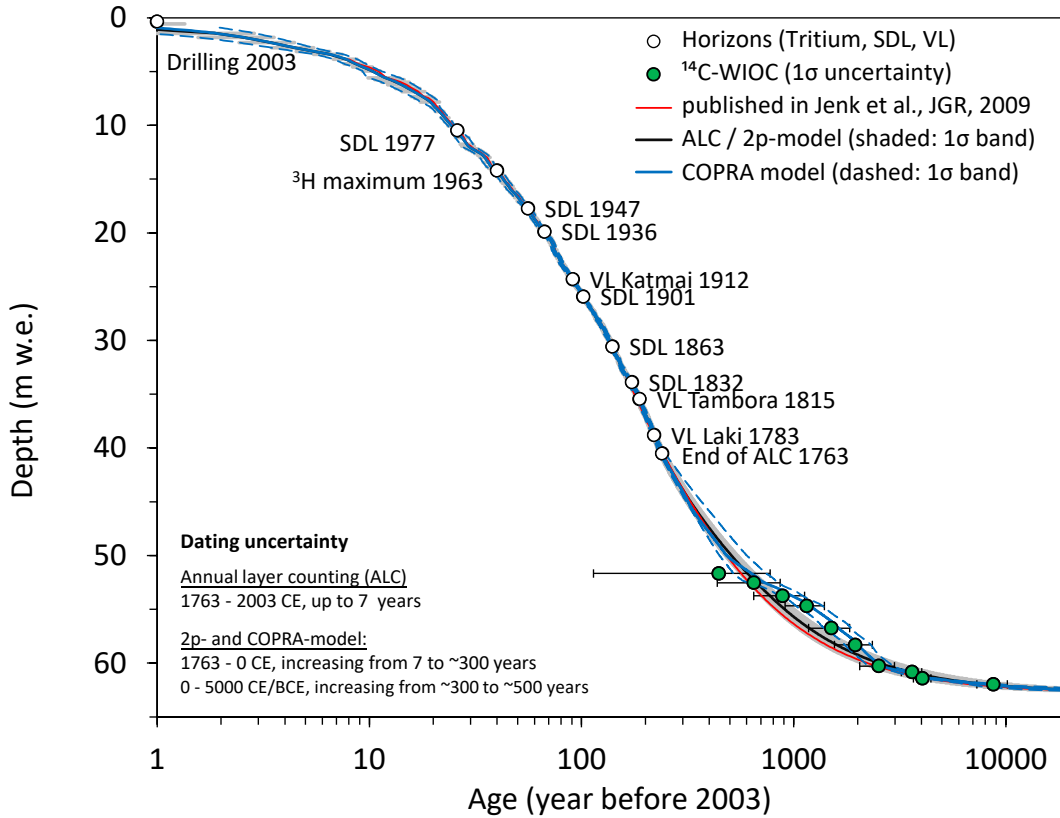

5 Figure S1: Dating of the Colle Gnifetti ice core (CG03B). Note the logarithmic age axis. This is a revised dating of Jenk et al. (2009) (red dashed line). This update also includes a revised counting of annual layers (ALC) based on additional reference horizons of historical Sahara dust layers (SDL) and volcanic layers (VL) (Sigl et al., 2018), as well as two additional  $^{14}\text{C}$ -dates (Sigl et al., 2009). For details see supplementary text 2. Additionally shown here is the age scale derive by using the COPRA model in an exact same approach as used for the Alto dell'Ortles cores dating and using the time horizons indicated (blue lines).

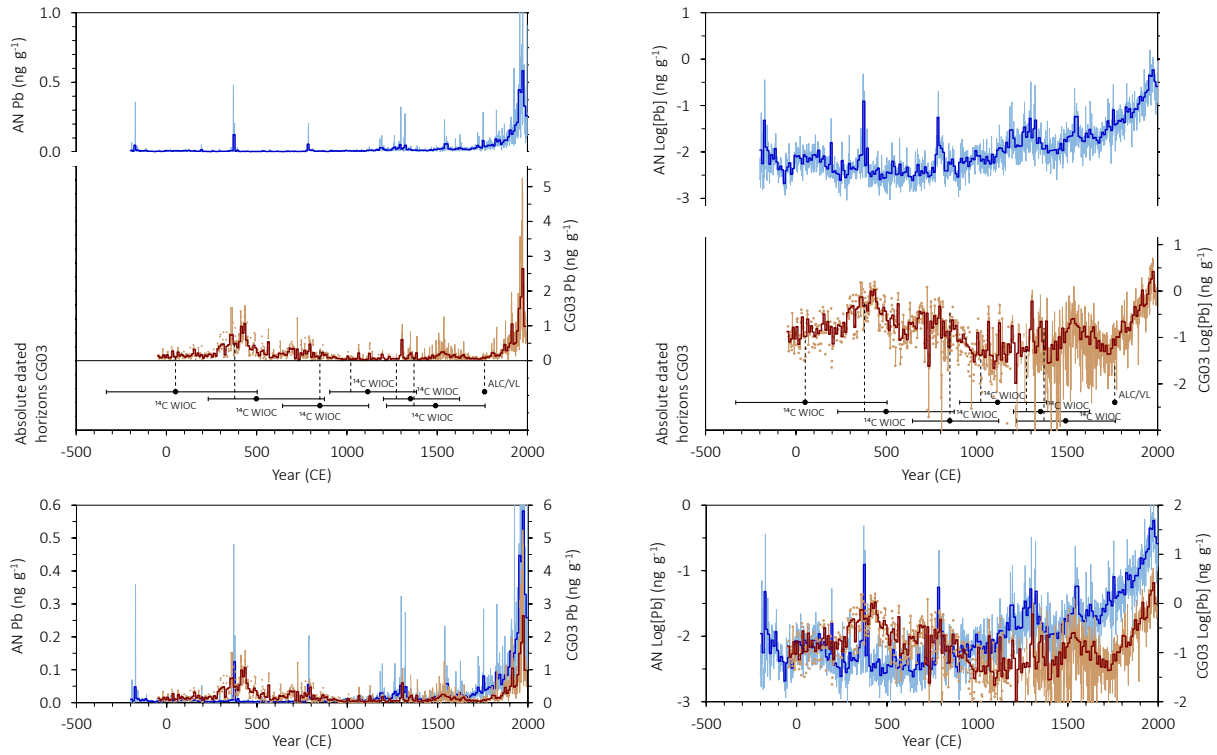

5 Figure S2: Comparison of the non-crustal Pb concentrations from the Colle Gnifetti ice core (CG03; dark red) with the record from Akademii Nauk (AN; blue). Thin and thick lines show annual and 10-year averages, respectively. Absolute ages from  $^{14}\text{C}$  dating (or ALC/VL) are shown at the bottom (dots indicate the  $\mu$ -age and error bars the  $1\sigma$  range), with the thick dashed line connecting to the record for visualizing the time horizons used to construct the CG03B time scale with COPRA (see supplementary text 2 and Fig. S1). Same for both panels, except for Pb concentrations being plotted on a logarithmic scale on the right panel. Bottom two panels with the Pb records shown in the upper panels being overlayed to facilitate visual comparison.

10

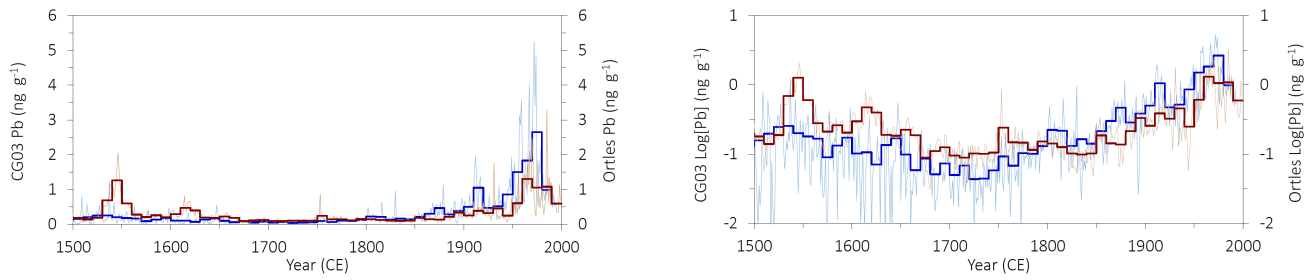

5

Figure S3: Comparison of the non-crustal Pb concentrations from Alto dell'Ortles #3 on CP2025/2 (Ortles; dark red) with the record from the Colle Gnifetti ice core (CG03; blue). Thin and thick lines show annual and 10-year averages, respectively. Same for both panels, except for Pb concentrations being plotted on a logarithmic scale on the right panel.

10

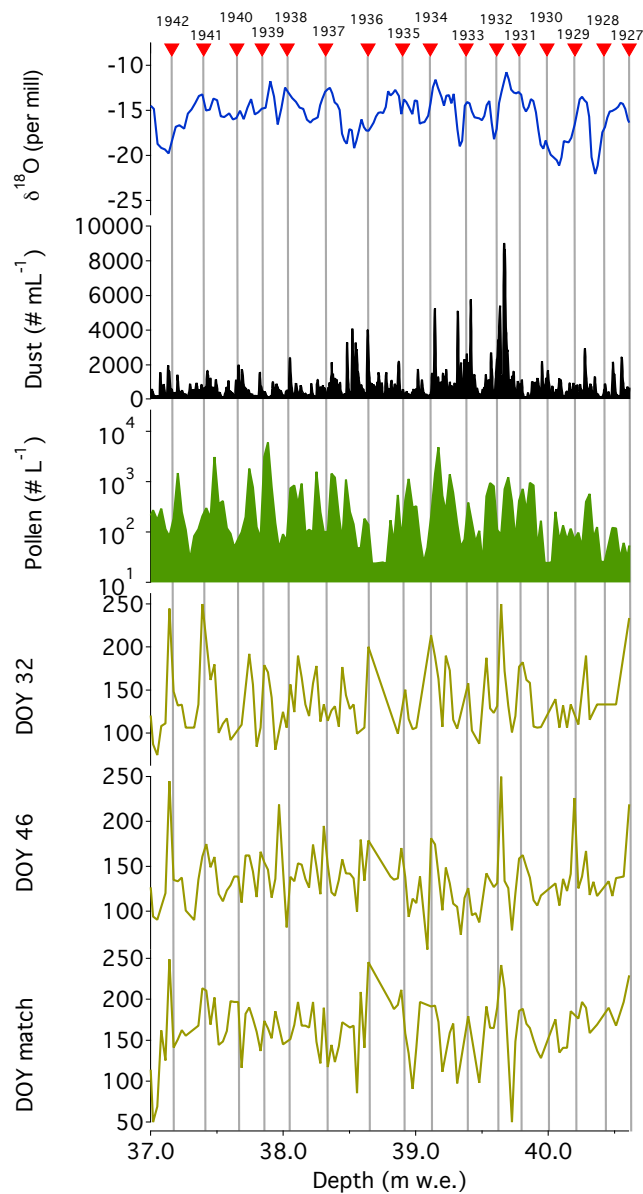

Figure S4: Annual layers between 37 and 41 m water equivalent (w.e.) in core #1 as shown by  $\delta^{18}\text{O}$ , dust and pollen concentrations, DOY 32 and 46 and DOY depth-to-day match (see main text).



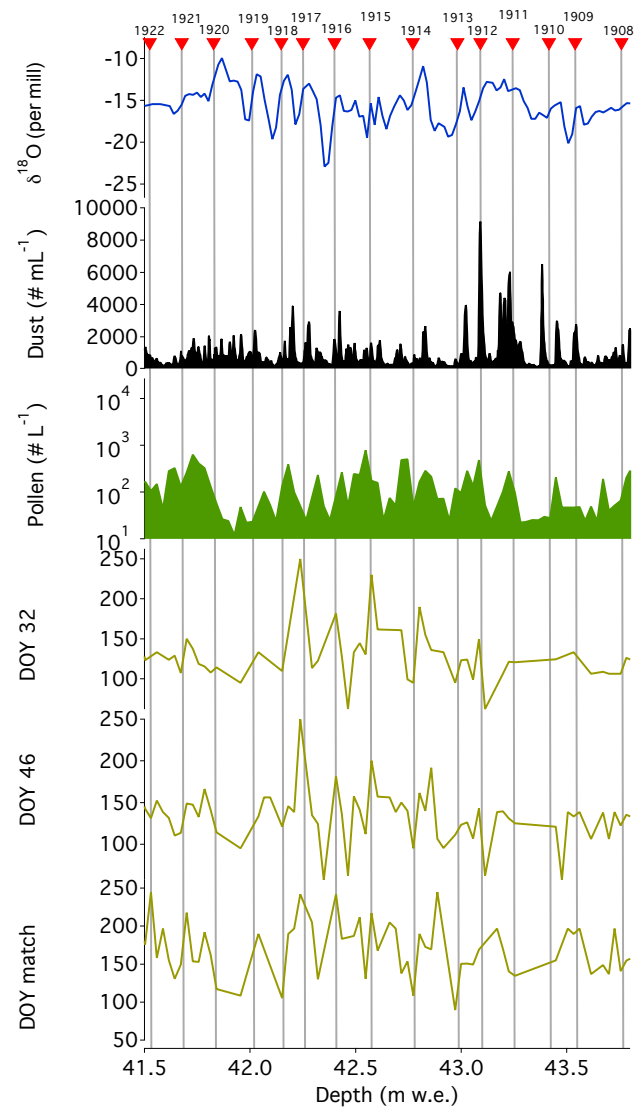

Figure S5: Annual layers between 41.5 and 43.5 m water equivalent (w.e.) in core #1 as shown by  $\delta^{18}\text{O}$ , dust and pollen concentrations, DOY 32 and 46 and DOY depth-to-day match (see main text).

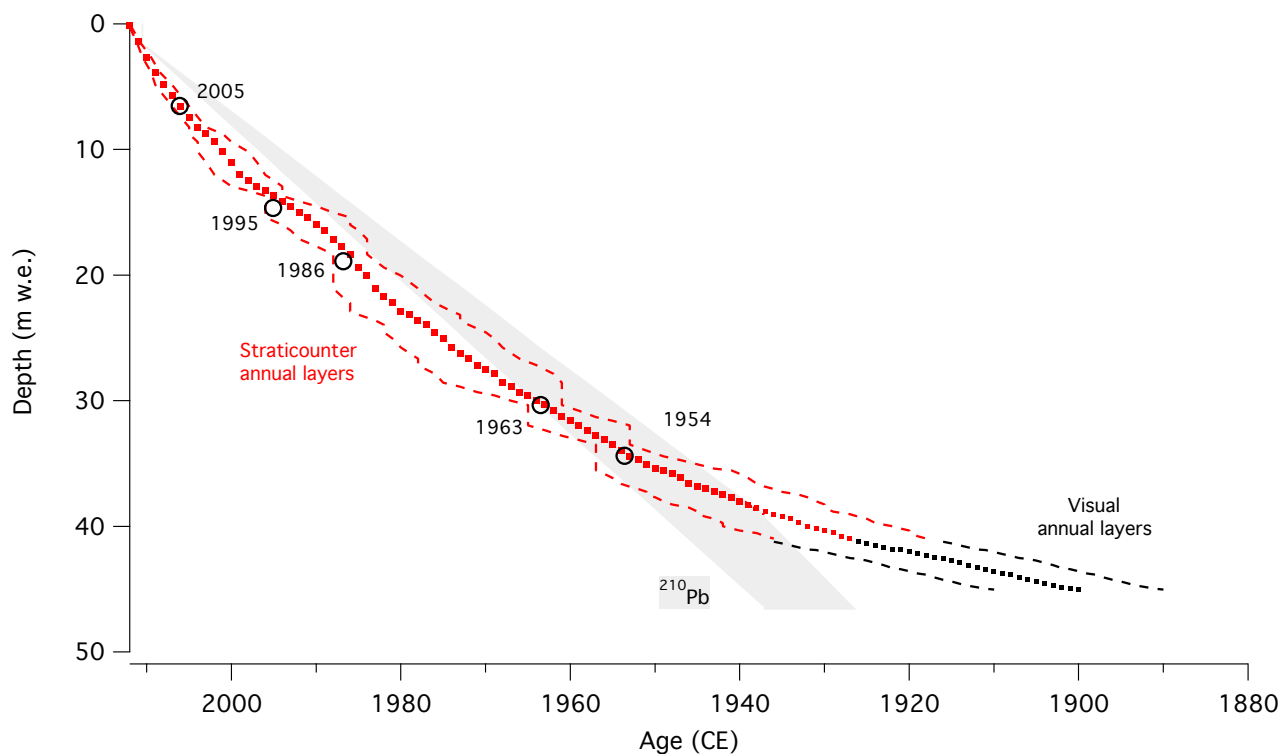

Figure S6: Comparison of the different time markers obtained in the shallow (recent) part of the Alto dell'Ortles cores. StratiCounter annual layer automatic counting (red dots; within 95% uncertainty) are superimposed on 5 fixed time markers (open circles; see also Table 3).  $^{210}\text{Pb}$  ages from the TC2016 chronology are shown with uncertainty range (grey area; from Gabrielli et al., 2016). Annual layers are determined by visual counting (black dots within an assumed 10 years uncertainty).

Supplementary Table 1: Time markers used for the CP2025/1 timescale construction (part 1).

| Depth in core #2 (m w.e.) | Age (yrsl2012) | Age uncertainty (years) | Type of time marker                                      | Used in COPRA model |
|---------------------------|----------------|-------------------------|----------------------------------------------------------|---------------------|
| 0.144                     | 0.01           | 0.1                     | Annual layer (Stratocounter)                             | ✓                   |
| 1.435                     | 1              | 0.2                     | Annual layer (Stratocounter)                             | ✓                   |
| 2.652                     | 2              | 0.5                     | Annual layer (Stratocounter)                             | ✓                   |
| 3.843                     | 3              | 0.5                     | Annual layer (Stratocounter)                             | ✓                   |
| 4.868                     | 4              | 1                       | Annual layer (Stratocounter)                             | ✓                   |
| 5.713                     | 5              | 1                       | Annual layer (Stratocounter)                             | ✓                   |
| 6.551                     | 6              | 1                       | Annual layer (Stratocounter) and 2006 pollen peak        | ✓                   |
| 7.404                     | 7              | 1                       | Annual layer (Stratocounter)                             | ✓                   |
| 8.217                     | 8              | 1                       | Annual layer (Stratocounter)                             | ✓                   |
| 8.761                     | 9              | 2                       | Annual layer (Stratocounter)                             | ✓                   |
| 9.407                     | 10             | 2                       | Annual layer (Stratocounter)                             | ✓                   |
| 10.182                    | 11             | 3                       | Annual layer (Stratocounter)                             | ✓                   |
| 11.022                    | 12             | 3                       | Annual layer (Stratocounter)                             | ✓                   |
| 12.017                    | 13             | 3                       | Annual layer (Stratocounter)                             | ✓                   |
| 12.457                    | 14             | 3                       | Annual layer (Stratocounter)                             | ✓                   |
| 12.931                    | 15             | 3                       | Annual layer (Stratocounter)                             | ✓                   |
| 13.268                    | 16             | 2                       | Annual layer (Stratocounter)                             | ✓                   |
| 13.687                    | 17             | 1                       | Annual layer (Stratocounter) and 1995 pollen peak        | ✓                   |
| 14.116                    | 18             | 2                       | Annual layer (Stratocounter)                             | ✓                   |
| 14.509                    | 19             | 3                       | Annual layer (Stratocounter)                             | ✓                   |
| 15.011                    | 20             | 4                       | Annual layer (Stratocounter)                             | ✓                   |
| 15.402                    | 21             | 5                       | Annual layer (Stratocounter)                             | ✓                   |
| 16.001                    | 22             | 4                       | Annual layer (Stratocounter)                             | ✓                   |
| 16.454                    | 23             | 4                       | Annual layer (Stratocounter)                             | ✓                   |
| 17.121                    | 24             | 4                       | Annual layer (Stratocounter)                             | ✓                   |
| 17.712                    | 25             | 3                       | Annual layer (Stratocounter)                             | ✓                   |
| 18.332                    | 26             | 2                       | Annual layer (Stratocounter) and 1986 Beta peak          | ✓                   |
| 19.395                    | 27             | 3                       | Annual layer (Stratocounter)                             | ✓                   |
| 20.036                    | 28             | 4                       | Annual layer (Stratocounter)                             | ✓                   |
| 21.048                    | 29             | 5                       | Annual layer (Stratocounter)                             | ✓                   |
| 21.660                    | 30             | 5                       | Annual layer (Stratocounter)                             | ✓                   |
| 22.223                    | 31             | 5                       | Annual layer (Stratocounter)                             | ✓                   |
| 22.884                    | 32             | 6                       | Annual layer (Stratocounter)                             | ✓                   |
| 23.162                    | 33             | 6                       | Annual layer (Stratocounter)                             | ✓                   |
| 23.615                    | 34             | 5                       | Annual layer (Stratocounter)                             | ✓                   |
| 23.952                    | 35             | 5                       | Annual layer (Stratocounter)                             | ✓                   |
| 24.536                    | 36             | 6                       | Annual layer (Stratocounter)                             | ✓                   |
| 25.043                    | 37             | 6                       | Annual layer (Stratocounter)                             | ✓                   |
| 25.761                    | 38             | 6                       | Annual layer (Stratocounter)                             | ✓                   |
| 26.200                    | 39             | 6                       | Annual layer (Stratocounter)                             | ✓                   |
| 26.633                    | 40             | 6                       | Annual layer (Stratocounter)                             | ✓                   |
| 27.166                    | 41             | 7                       | Annual layer (Stratocounter)                             | ✓                   |
| 27.510                    | 42             | 7                       | Annual layer (Stratocounter)                             | ✓                   |
| 27.849                    | 43             | 7                       | Annual layer (Stratocounter)                             | ✓                   |
| 28.550                    | 44             | 7                       | Annual layer (Stratocounter)                             | ✓                   |
| 28.880                    | 45             | 6                       | Annual layer (Stratocounter)                             | ✓                   |
| 29.307                    | 46             | 5                       | Annual layer (Stratocounter)                             | ✓                   |
| 29.573                    | 47             | 4                       | Annual layer (Stratocounter)                             | ✓                   |
| 29.985                    | 48             | 3                       | Annual layer (Stratocounter)                             | ✓                   |
| 30.327                    | 49             | 2                       | Annual layer (Stratocounter) and 1963 tritium beta peaks | ✓                   |
| 30.802                    | 50             | 3                       | Annual layer (Stratocounter)                             | ✓                   |
| 31.295                    | 51             | 4                       | Annual layer (Stratocounter)                             | ✓                   |
| 31.599                    | 52             | 5                       | Annual layer (Stratocounter)                             | ✓                   |
| 31.966                    | 53             | 6                       | Annual layer (Stratocounter)                             | ✓                   |
| 32.334                    | 54             | 5                       | Annual layer (Stratocounter)                             | ✓                   |
| 32.775                    | 55             | 4                       | Annual layer (Stratocounter)                             | ✓                   |
| 33.118                    | 56             | 3                       | Annual layer (Stratocounter)                             | ✓                   |
| 33.496                    | 57             | 2                       | Annual layer (Stratocounter) and 1955 beta peak          | ✓                   |
| 33.964                    | 58             | 3                       | Annual layer (Stratocounter)                             | ✓                   |
| 34.427                    | 59             | 4                       | Annual layer (Stratocounter)                             | ✓                   |
| 34.710                    | 60             | 5                       | Annual layer (Stratocounter)                             | ✓                   |
| 35.061                    | 61             | 6                       | Annual layer (Stratocounter)                             | ✓                   |
| 35.399                    | 62             | 7                       | Annual layer (Stratocounter)                             | ✓                   |
| 35.549                    | 63             | 8                       | Annual layer (Stratocounter)                             | ✓                   |

Supplementary Table 1: Time markers used for the CP2025/1 timescale construction (part 2).

| Depth in core #2 (m w.e.) | Age (yrSB2012) | Age uncertainty (years) | Type of time marker              | Used in COPRA model |
|---------------------------|----------------|-------------------------|----------------------------------|---------------------|
| 35.819                    | 64             | 8                       | Annual layer (Stratcounter)      | ✓                   |
| 36.153                    | 65             | 8                       | Annual layer (Stratcounter)      | ✓                   |
| 36.603                    | 66             | 8                       | Annual layer (Stratcounter)      | ✓                   |
| 36.831                    | 67             | 8                       | Annual layer (Stratcounter)      | ✓                   |
| 37.014                    | 68             | 8                       | Annual layer (Stratcounter)      | ✓                   |
| 37.252                    | 69             | 8                       | Annual layer (Stratcounter)      | ✓                   |
| 37.468                    | 70             | 9                       | Annual layer (Stratcounter)      | ✓                   |
| 37.675                    | 71             | 9                       | Annual layer (Stratcounter)      | ✓                   |
| 38.002                    | 72             | 9                       | Annual layer (Stratcounter)      | ✓                   |
| 38.244                    | 73             | 9                       | Annual layer (Stratcounter)      | ✓                   |
| 38.503                    | 74             | 8                       | Annual layer (Stratcounter)      | ✓                   |
| 38.819                    | 75             | 8                       | Annual layer (Stratcounter)      | ✓                   |
| 39.020                    | 76             | 9                       | Annual layer (Stratcounter)      | ✓                   |
| 39.227                    | 77             | 9                       | Annual layer (Stratcounter)      | ✓                   |
| 39.391                    | 78             | 9                       | Annual layer (Stratcounter)      | ✓                   |
| 39.739                    | 79             | 9                       | Annual layer (Stratcounter)      | ✓                   |
| 39.977                    | 80             | 10                      | Annual layer (Stratcounter)      | ✓                   |
| 40.171                    | 81             | 10                      | Annual layer (Stratcounter)      | ✓                   |
| 40.329                    | 82             | 10                      | Annual layer (Stratcounter)      | ✓                   |
| 40.533                    | 83             | 9                       | Annual layer (Stratcounter)      | ✓                   |
| 40.796                    | 84             | 9                       | Annual layer (Stratcounter)      | ✓                   |
| 40.966                    | 85             | 9                       | Annual layer (Stratcounter)      | ✓                   |
| 41.227                    | 86             | 10                      | Annual layer (Stratcounter)      | ✓                   |
| 41.354                    | 87             | 10                      | Annual layer (Stratcounter)      | ✓                   |
| 41.509                    | 88             | 10                      | Annual layer (Stratcounter)      | ✓                   |
| 41.677                    | 89             | 10                      | Annual layer (Stratcounter)      | ✓                   |
| 41.834                    | 90             | 10                      | Annual layer (Stratcounter)      | ✓                   |
| 41.885                    | 91             | 10                      | Annual layer (Stratcounter)      | ✓                   |
| 42.037                    | 92             | 10                      | Annual layer (Stratcounter)      | ✓                   |
| 42.188                    | 93             | 10                      | Annual layer (Stratcounter)      | ✓                   |
| 42.367                    | 94             | 10                      | Annual layer (Stratcounter)      | ✓                   |
| 42.511                    | 95             | 10                      | Annual layer (Stratcounter)      | ✓                   |
| 42.595                    | 96             | 10                      | Annual layer (Stratcounter)      | ✓                   |
| 42.732                    | 97             | 10                      | Annual layer (Stratcounter)      | ✓                   |
| 42.911                    | 98             | 10                      | Annual layer (Stratcounter)      | ✓                   |
| 43.092                    | 99             | 10                      | Annual layer (Stratcounter)      | ✓                   |
| 43.311                    | 100            | 10                      | Annual layer (Stratcounter)      | ✓                   |
| 43.410                    | 101            | 10                      | Annual layer (Stratcounter)      | ✓                   |
| 43.566                    | 102            | 10                      | Annual layer (Stratcounter)      | ✓                   |
| 43.739                    | 103            | 10                      | Annual layer (Stratcounter)      | ✓                   |
| 43.851                    | 104            | 10                      | Annual layer (Stratcounter)      | ✓                   |
| 44.061                    | 105            | 10                      | Annual layer (Stratcounter)      | ✓                   |
| 44.247                    | 106            | 10                      | Annual layer (Stratcounter)      | ✓                   |
| 44.397                    | 107            | 10                      | Annual layer (Stratcounter)      | ✓                   |
| 44.569                    | 108            | 10                      | Annual layer (Stratcounter)      | ✓                   |
| 44.728                    | 109            | 10                      | Annual layer (Stratcounter)      | ✓                   |
| 44.836                    | 110            | 10                      | Annual layer (Stratcounter)      | ✓                   |
| 44.951                    | 111            | 10                      | Annual layer (Stratcounter)      | ✓                   |
| 45.023                    | 112            | 10                      | Annual layer (Stratcounter)      | ✓                   |
| 49.332                    | 257            | 20                      | Pb tie point with SZ core        | ✓                   |
| 51.070                    | 337            | 20                      | Pb tie point with SZ core        | ✓                   |
| 51.568                    | 387            | 20                      | Pb tie point with SZ core        | ✓                   |
| 52.482                    | 467            | 20                      | Pb tie point with SZ core        | ✓                   |
| 54.652                    | 717            | 40                      | Pb tie point with SZ core        | ✓                   |
| 55.243                    | 651            | 204                     | <sup>14</sup> C of bulk (WIOC)   | X                   |
| 56.203                    | 1117           | 60                      | Pb tie point with SZ core        | ✓                   |
| 57.045                    | 1277           | 50                      | Pb tie point with SZ core        | ✓                   |
| 58.110                    | 1637           | 30                      | Pb tie point with SZ core        | ✓                   |
| 58.295                    | 1767           | 50                      | Pb tie point with SZ core        | ✓                   |
| 58.433                    | 1570           | 288                     | <sup>14</sup> C of bulk (WIOC)   | X                   |
| 58.850                    | 2244           | 126                     | <sup>14</sup> C of macrofragment | X                   |
| 58.994                    | 2077           | 40                      | Pb tie point with SZ core        | ✓                   |
| 59.107                    | 2187           | 30                      | Pb tie point with SZ core        | ✓                   |
| 59.470                    | 2671           | 102                     | <sup>14</sup> C of macrofragment | ✓                   |
| 60.288                    | 4233           | 524                     | <sup>14</sup> C of bulk (WIOC)   | ✓                   |
| 60.510                    | 5238           | 531                     | <sup>14</sup> C of bulk (WIOC)   | ✓                   |
| 60.712                    | 6801           | 364                     | <sup>14</sup> C of bulk (WIOC)   | ✓                   |

Supplementary Table 2: Time markers used for the and CP2025/2 timescale construction (part 1).

| Depth in core #2 (m w.e.) | Age (yrSB2012) | Age uncertainty (years) | Type of time marker                                     | Used in COPRA model |
|---------------------------|----------------|-------------------------|---------------------------------------------------------|---------------------|
| 0.144                     | 0.01           | 0.1                     | Annual layer (Stratcounter)                             | ✓                   |
| 1.435                     | 1              | 0.2                     | Annual layer (Stratcounter)                             | ✓                   |
| 2.652                     | 2              | 0.5                     | Annual layer (Stratcounter)                             | ✓                   |
| 3.843                     | 3              | 0.5                     | Annual layer (Stratcounter)                             | ✓                   |
| 4.868                     | 4              | 1                       | Annual layer (Stratcounter)                             | ✓                   |
| 5.713                     | 5              | 1                       | Annual layer (Stratcounter)                             | ✓                   |
| 6.551                     | 6              | 1                       | Annual layer (Stratcounter) and 2006 pollen peak        | ✓                   |
| 7.404                     | 7              | 1                       | Annual layer (Stratcounter)                             | ✓                   |
| 8.217                     | 8              | 1                       | Annual layer (Stratcounter)                             | ✓                   |
| 8.761                     | 9              | 2                       | Annual layer (Stratcounter)                             | ✓                   |
| 9.407                     | 10             | 2                       | Annual layer (Stratcounter)                             | ✓                   |
| 10.182                    | 11             | 3                       | Annual layer (Stratcounter)                             | ✓                   |
| 11.022                    | 12             | 3                       | Annual layer (Stratcounter)                             | ✓                   |
| 12.017                    | 13             | 3                       | Annual layer (Stratcounter)                             | ✓                   |
| 12.457                    | 14             | 3                       | Annual layer (Stratcounter)                             | ✓                   |
| 12.931                    | 15             | 3                       | Annual layer (Stratcounter)                             | ✓                   |
| 13.268                    | 16             | 2                       | Annual layer (Stratcounter)                             | ✓                   |
| 13.687                    | 17             | 1                       | Annual layer (Stratcounter) and 1995 pollen peak        | ✓                   |
| 14.116                    | 18             | 2                       | Annual layer (Stratcounter)                             | ✓                   |
| 14.509                    | 19             | 3                       | Annual layer (Stratcounter)                             | ✓                   |
| 15.011                    | 20             | 4                       | Annual layer (Stratcounter)                             | ✓                   |
| 15.402                    | 21             | 5                       | Annual layer (Stratcounter)                             | ✓                   |
| 16.001                    | 22             | 4                       | Annual layer (Stratcounter)                             | ✓                   |
| 16.454                    | 23             | 4                       | Annual layer (Stratcounter)                             | ✓                   |
| 17.121                    | 24             | 4                       | Annual layer (Stratcounter)                             | ✓                   |
| 17.712                    | 25             | 3                       | Annual layer (Stratcounter)                             | ✓                   |
| 18.332                    | 26             | 2                       | Annual layer (Stratcounter) and 1986 Beta peak          | ✓                   |
| 19.395                    | 27             | 3                       | Annual layer (Stratcounter)                             | ✓                   |
| 20.036                    | 28             | 4                       | Annual layer (Stratcounter)                             | ✓                   |
| 21.048                    | 29             | 5                       | Annual layer (Stratcounter)                             | ✓                   |
| 21.660                    | 30             | 5                       | Annual layer (Stratcounter)                             | ✓                   |
| 22.223                    | 31             | 5                       | Annual layer (Stratcounter)                             | ✓                   |
| 22.884                    | 32             | 6                       | Annual layer (Stratcounter)                             | ✓                   |
| 23.162                    | 33             | 6                       | Annual layer (Stratcounter)                             | ✓                   |
| 23.615                    | 34             | 5                       | Annual layer (Stratcounter)                             | ✓                   |
| 23.952                    | 35             | 5                       | Annual layer (Stratcounter)                             | ✓                   |
| 24.536                    | 36             | 6                       | Annual layer (Stratcounter)                             | ✓                   |
| 25.043                    | 37             | 6                       | Annual layer (Stratcounter)                             | ✓                   |
| 25.761                    | 38             | 6                       | Annual layer (Stratcounter)                             | ✓                   |
| 26.200                    | 39             | 6                       | Annual layer (Stratcounter)                             | ✓                   |
| 26.633                    | 40             | 6                       | Annual layer (Stratcounter)                             | ✓                   |
| 27.166                    | 41             | 7                       | Annual layer (Stratcounter)                             | ✓                   |
| 27.510                    | 42             | 7                       | Annual layer (Stratcounter)                             | ✓                   |
| 27.849                    | 43             | 7                       | Annual layer (Stratcounter)                             | ✓                   |
| 28.550                    | 44             | 7                       | Annual layer (Stratcounter)                             | ✓                   |
| 28.880                    | 45             | 6                       | Annual layer (Stratcounter)                             | ✓                   |
| 29.307                    | 46             | 5                       | Annual layer (Stratcounter)                             | ✓                   |
| 29.573                    | 47             | 4                       | Annual layer (Stratcounter)                             | ✓                   |
| 29.985                    | 48             | 3                       | Annual layer (Stratcounter)                             | ✓                   |
| 30.327                    | 49             | 2                       | Annual layer (Stratcounter) and 1963 tritium beta peaks | ✓                   |
| 30.802                    | 50             | 3                       | Annual layer (Stratcounter)                             | ✓                   |
| 31.295                    | 51             | 4                       | Annual layer (Stratcounter)                             | ✓                   |
| 31.599                    | 52             | 5                       | Annual layer (Stratcounter)                             | ✓                   |
| 31.966                    | 53             | 6                       | Annual layer (Stratcounter)                             | ✓                   |
| 32.334                    | 54             | 5                       | Annual layer (Stratcounter)                             | ✓                   |
| 32.775                    | 55             | 4                       | Annual layer (Stratcounter)                             | ✓                   |
| 33.118                    | 56             | 3                       | Annual layer (Stratcounter)                             | ✓                   |
| 33.496                    | 57             | 2                       | Annual layer (Stratcounter) and 1955 beta peak          | ✓                   |
| 33.964                    | 58             | 3                       | Annual layer (Stratcounter)                             | ✓                   |
| 34.427                    | 59             | 4                       | Annual layer (Stratcounter)                             | ✓                   |
| 34.710                    | 60             | 5                       | Annual layer (Stratcounter)                             | ✓                   |
| 35.061                    | 61             | 6                       | Annual layer (Stratcounter)                             | ✓                   |
| 35.399                    | 62             | 7                       | Annual layer (Stratcounter)                             | ✓                   |
| 35.549                    | 63             | 8                       | Annual layer (Stratcounter)                             | ✓                   |

Supplementary Table 2: Time markers used for the and CP2025/2 timescale construction (part 2).

| Depth in core #2 (m w.e.) | Age (yrSB2012) | Age uncertainty (years) | Type of time marker              | Used in COPRA model |
|---------------------------|----------------|-------------------------|----------------------------------|---------------------|
| 35.819                    | 64             | 8                       | Annual layer (Stratocounter)     | ✓                   |
| 36.153                    | 65             | 8                       | Annual layer (Stratocounter)     | ✓                   |
| 36.603                    | 66             | 8                       | Annual layer (Stratocounter)     | ✓                   |
| 36.831                    | 67             | 8                       | Annual layer (Stratocounter)     | ✓                   |
| 37.014                    | 68             | 8                       | Annual layer (Stratocounter)     | ✓                   |
| 37.252                    | 69             | 8                       | Annual layer (Stratocounter)     | ✓                   |
| 37.468                    | 70             | 9                       | Annual layer (Stratocounter)     | ✓                   |
| 37.675                    | 71             | 9                       | Annual layer (Stratocounter)     | ✓                   |
| 38.002                    | 72             | 9                       | Annual layer (Stratocounter)     | ✓                   |
| 38.244                    | 73             | 9                       | Annual layer (Stratocounter)     | ✓                   |
| 38.503                    | 74             | 8                       | Annual layer (Stratocounter)     | ✓                   |
| 38.819                    | 75             | 8                       | Annual layer (Stratocounter)     | ✓                   |
| 39.020                    | 76             | 9                       | Annual layer (Stratocounter)     | ✓                   |
| 39.227                    | 77             | 9                       | Annual layer (Stratocounter)     | ✓                   |
| 39.391                    | 78             | 9                       | Annual layer (Stratocounter)     | ✓                   |
| 39.739                    | 79             | 9                       | Annual layer (Stratocounter)     | ✓                   |
| 39.977                    | 80             | 10                      | Annual layer (Stratocounter)     | ✓                   |
| 40.171                    | 81             | 10                      | Annual layer (Stratocounter)     | ✓                   |
| 40.329                    | 82             | 10                      | Annual layer (Stratocounter)     | ✓                   |
| 40.533                    | 83             | 9                       | Annual layer (Stratocounter)     | ✓                   |
| 40.796                    | 84             | 9                       | Annual layer (Stratocounter)     | ✓                   |
| 40.966                    | 85             | 9                       | Annual layer (Stratocounter)     | ✓                   |
| 41.227                    | 86             | 10                      | Annual layer (Stratocounter)     | ✓                   |
| 41.354                    | 87             | 10                      | Annual layer (Stratocounter)     | ✓                   |
| 41.509                    | 88             | 10                      | Annual layer (Stratocounter)     | ✓                   |
| 41.677                    | 89             | 10                      | Annual layer (Stratocounter)     | ✓                   |
| 41.834                    | 90             | 10                      | Annual layer (Stratocounter)     | ✓                   |
| 41.885                    | 91             | 10                      | Annual layer (Stratocounter)     | ✓                   |
| 42.037                    | 92             | 10                      | Annual layer (Stratocounter)     | ✓                   |
| 42.188                    | 93             | 10                      | Annual layer (Stratocounter)     | ✓                   |
| 42.367                    | 94             | 10                      | Annual layer (Stratocounter)     | ✓                   |
| 42.511                    | 95             | 10                      | Annual layer (Stratocounter)     | ✓                   |
| 42.595                    | 96             | 10                      | Annual layer (Stratocounter)     | ✓                   |
| 42.732                    | 97             | 10                      | Annual layer (Stratocounter)     | ✓                   |
| 42.911                    | 98             | 10                      | Annual layer (Stratocounter)     | ✓                   |
| 43.092                    | 99             | 10                      | Annual layer (Stratocounter)     | ✓                   |
| 43.311                    | 100            | 10                      | Annual layer (Stratocounter)     | ✓                   |
| 43.410                    | 101            | 10                      | Annual layer (Stratocounter)     | ✓                   |
| 43.566                    | 102            | 10                      | Annual layer (Stratocounter)     | ✓                   |
| 43.739                    | 103            | 10                      | Annual layer (Stratocounter)     | ✓                   |
| 43.851                    | 104            | 10                      | Annual layer (Stratocounter)     | ✓                   |
| 44.061                    | 105            | 10                      | Annual layer (Stratocounter)     | ✓                   |
| 44.247                    | 106            | 10                      | Annual layer (Stratocounter)     | ✓                   |
| 44.397                    | 107            | 10                      | Annual layer (Stratocounter)     | ✓                   |
| 44.569                    | 108            | 10                      | Annual layer (Stratocounter)     | ✓                   |
| 44.728                    | 109            | 10                      | Annual layer (Stratocounter)     | ✓                   |
| 44.836                    | 110            | 10                      | Annual layer (Stratocounter)     | ✓                   |
| 44.951                    | 111            | 10                      | Annual layer (Stratocounter)     | ✓                   |
| 45.023                    | 112            | 10                      | Annual layer (Stratocounter)     | ✓                   |
| 49.332                    | 257            | 20                      | Pb tie point with SZ core        | ✓                   |
| 51.070                    | 337            | 20                      | Pb tie point with SZ core        | ✓                   |
| 51.568                    | 387            | 20                      | Pb tie point with SZ core        | ✓                   |
| 52.482                    | 467            | 20                      | Pb tie point with SZ core        | ✓                   |
| 54.652                    | 717            | 40                      | Pb tie point with SZ core        | ✓                   |
| 55.243                    | 651            | 204                     | <sup>14</sup> C of bulk (WIOC)   | X                   |
| 56.203                    | 1117           | 60                      | Pb tie point with SZ core        | ✓                   |
| 57.045                    | 1277           | 50                      | Pb tie point with SZ core        | ✓                   |
| 58.110                    | 1637           | 30                      | Pb tie point with SZ core        | ✓                   |
| 58.295                    | 1767           | 50                      | Pb tie point with SZ core        | ✓                   |
| 58.433                    | 1570           | 288                     | <sup>14</sup> C of bulk (WIOC)   | X                   |
| 58.850                    | 2244           | 126                     | <sup>14</sup> C of macrofragment | X                   |
| 58.994                    | 2077           | 40                      | Pb tie point with SZ core        | ✓                   |
| 59.107                    | 2187           | 30                      | Pb tie point with SZ core        | ✓                   |
| 59.470                    | 2671           | 102                     | <sup>14</sup> C of macrofragment | ✓                   |
| 60.288                    | 4233           | 524                     | <sup>14</sup> C of bulk (WIOC)   | ✓                   |
| 60.510                    | 5238           | 531                     | <sup>14</sup> C of bulk (WIOC)   | ✓                   |
| 60.712                    | 6801           | 364                     | <sup>14</sup> C of bulk (WIOC)   | ✓                   |

## Supplementary references

- 5       • Brugger, S. O., Schwikowski, M., Gobet, E., Schwörer, C., Rohr, C., Sigl, M., Henne, S., Pfister, C., Jenk, T. M., Henne, P. D., and Tinner, W.: Alpine Glacier Reveals Ecosystem Impacts of Europe's Prosperity and Peril Over the Last Millennium, *Geoph. Res. Let.*, 48, e2021GL095039, <https://doi.org/10.1029/2021GL095039>, 2021.
- 10       • Cogley, J. G., Hock, R., Rasmussen, L. A., Arendt, A. A., Bauder, A., Braithwaite, R. J., Jansson, P., Kaser, G., Möller, M., Nicholson, L., and Zemp, M.: Glossary of glacier mass balance and related term, UNESCO/IHP, Paris 2011.
- 15       • Gabrieli, J. and Barbante, C.: The Alps in the age of the Anthropocene: the impact of human activities on the cryosphere recorded in the Colle Gnifetti glacier, *Rend. Fis. Acc. Lincei*, 25, 71-83, 10.1007/s12210-014-0292-2, 2014.
- 20       • Gabrielli, P., Barbante, C., Bertagna, G., Bertó, M., Binder, D., Carton, A., Carturan, L., Cazorzi, F., Cozzi, G., Dalla Fontana, G., Davis, M., De Blasi, F., Dinale, R., Dragà, G., Dreossi, G., Festi, D., Frezzotti, M., Gabrieli, J., Galos, S., Ginot, P., Heidenwolf, P., Jenk, T. M., Kehrwald, N., Kenny, D., Magand, O., Mair, V., Mikhalenko, V. N., Lin, P. N., Oegg, K., Piffer, G., Rinaldi, M., Schotterer, U., Schwikowski, M., Seppi, R., Spolaor, A., Stenni, B., Tonidandel, D., Uglietti, C., Zagorodnov, V. S., Zanoner, T., and Zennaro, P.: Age of the Mt. Ortles ice cores, the Tyrolean Iceman and glaciation of the highest summit of South Tyrol since the Northern Hemisphere Climatic Optimum, *The Cryosphere*, 10, 2779–2797, 10.5194/tc-10-2779-2016, 2016.
- 25       • Jenk, T. M., Szidat, S., Bolius, D., Sigl, M., Gäggeler, H. W., Wacker, L., Ruff, M., Barbante, C., Boutron, C. F., and Schwikowski, M.: A novel radiocarbon dating technique applied to an ice core from the Alps indicating late Pleistocene ages *J. Geophys. Res. Atmos.*, 114, [10.1029/2009JD011860](https://doi.org/10.1029/2009JD011860), 2009.
- 30       • Schwikowski, M., Barbante, C., Doering, T., Gaeggeler, H. W., Boutron, C. F., Schotterer, U., Tobler, L., Van de Velde, K., Ferrari, C., Cozzi, G., Rosman, K., and Cescon, P.: Post-17th-century changes of European lead emissions recorded in high-altitude alpine snow and ice, *Environ. Sci. Technol.*, 38, 957-964, 2004.
- 35       • Sigl, M., Abram, N. J., Gabrieli, J., Jenk, T. M., Osmont, D., and Schwikowski, M.: 19th century glacier retreat in the Alps preceded the emergence of industrial black carbon deposition on high-alpine glaciers, *The Cryosphere*, 12, 3311-3331, 10.5194/tc-12-3311-2018, 2018.
- Sigl, M., Jenk, T. M., Kellerhals, T., Szidat, S., Gäggeler, H. W., Wacker, L., Synal, H. A., Boutron, C. F., Barbante, C., Gabrieli, J., and Schwikowski, M.: Instruments and methods: towards radiocarbon dating of ice cores, *J. Glaciol.*, 55, 985-996, 2009.
- Whillans, I. M.: The Equation of Continuity and its Application to the Ice Sheet Near “byrd” Station, Antarctica, *J. Glaciol.*, 18, 359-371, 10.3189/S0022143000021055, 1977.
